# Supplementary material for: Synthesis of bifunctional reduced graphene oxide/CuS/Au composite nanosheets for in situ monitoring of a peroxidase-like catalytic reaction by surface-enhanced Raman spectroscopy
Source: Royal Society of Chemistry journal article supplement (doi:10.1039/c6ra09471f), 2016-01-01
Supplement: c6ra09471f1.pdf [file c6ra09471f1.pdf]

## Supporting Information

### **Synthesis of bifunctional reduced graphene oxide/CuS/Au composite nanosheets for in situ monitoring of peroxidase-like catalytic reaction by surface-enhanced Raman spectroscopy**

*Wei. Song,<sup>a,b</sup> Guangdi Nie,<sup>c</sup> Wei. Ji,<sup>b</sup> Yanzhou Jiang,<sup>c</sup> Xiaofeng Lu,<sup>b,c</sup> Bing Zhao,<sup>a\*</sup>  
and Yukihiro Ozaki<sup>b\*</sup>*

*a. State Key Laboratory of Supramolecular Structure and Materials, Jilin  
University, Changchun 130012, P. R. China*

*b. School of Science and Technology, Kwansei Gakuin University, 2-1 Gakuen,  
Sanda, Hyogo 660-1337, Japan*

*c. Alan G. MacDiarmid Institute, College of Chemistry, Jilin University, Changchun,  
P. R. China, 130012*

\*Corresponding author: Email: [zhaob@jlu.edu.cn](mailto:zhaob@jlu.edu.cn); [ozaki@kwansei.ac.jp](mailto:ozaki@kwansei.ac.jp)

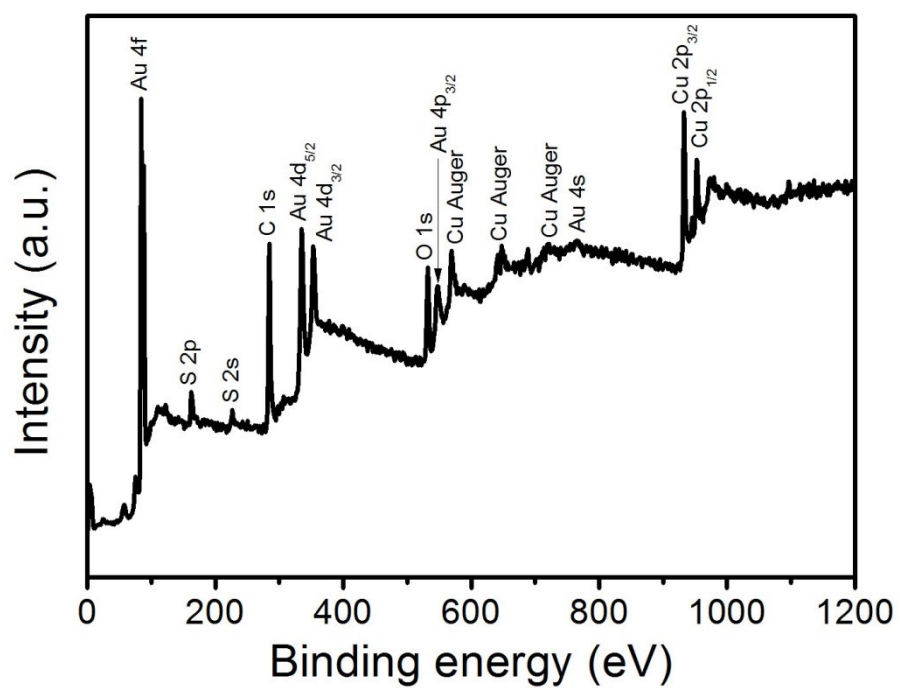

Figure S1. XPS full spectrum of the as-prepared rGO/CuS/Au composite nanosheets.
